# Supplementary material
Source: publisher site journal article supplement (https://www.dovepress.com/get_supplementary_file.php?f=319829.docx)
Supplement: Supplementary file 1 [file get_supplementary_file.php]

Appendix 1. COVID-19 Interview questions

**COVID-19 INTERVIEW QUESTIONS**

1. What role did you play in the COVID-19 strategic plan?
2. When did you first become involved?
3. What inspired you to prepare WVUH for COVID-19 before there were any known cases in the state?
4. What do you feel was your personal contributions to the plan?
5. How do you feel about your colleagues on the team and their contributions?
6. How did you perceive the collaboration among the team members, especially when conflicts arose?
7. Can you provide a few specific examples of conflicting views and how they were resolved?
8. Were there specific aspects of the team process that were particularly effective that we could share with other healthcare organizations?
9. How did you balance centralized HICS guidance with the unique needs of individual medical services and departments?
10. How useful was guidance from other organizations from CDC to other hospitals?
11. How successful was the final plan? Was it sufficiently comprehensive? Detailed?
12. Why do you think we were successful in implementing changes?
13. How important was HICS?
14. What are some of the highlights and unique features of the strategic plan that should be shared with other hospital systems?
15. Looking back, what could have gone better? Specific areas that were missed or inadequately addressed?
16. Any idea how the WVUH COVID-19 strategic plan compares to similar hospitals?
17. Going forward, do you have any suggestions regarding modifications or additions to the WVUH COVID-19 strategic plan?
18. Were there sufficient steps built into the strategic plan to handle significant changes in the pandemic locally; both surges and reductions?
19. Who else do you think we need to talk to, in order to get a comprehensive picture?
